# Supplementary material for: Midazolam Alters Acid-Base Status Less than Azaperone during the Capture and Transport of Southern White Rhinoceroses (Ceratotherium simum simum)
Source: PubMed Central journal article supplement (PMC7460343; doi:10.3390/ani10081323), 2020-07-31
Supplement: animals-10-01323-s001.pdf [file animals-10-01323-s001.pdf]

# Supplementary Files: Midazolam Alters Acid-Base Status Less than Azaperone during the Capture and Transport of Southern White Rhinoceroses (*Ceratotherium simum simum*)

Friederike Pohlin <sup>1,2,3,\*</sup>, Peter Buss <sup>2,4</sup>, Emma H. Hooijberg <sup>2,5</sup> and Leith C.R. Meyer <sup>2,3</sup>

**Table S1.** Mean  $\pm$  standard deviation for measured clinical chemistry analyte concentrations used to calculate, or interpret, dependent acid-base variables: sodium (Na<sup>+</sup>), potassium (K<sup>+</sup>), chloride (Cl<sup>-</sup>), ionized calcium (iCa<sup>++</sup>), magnesium (Mg), inorganic phosphorus (Pi), albumin, globulin, glucose, urea, and creatinine in rhinoceroses captured and transported with either azaperone (group A) or midazolam (group M). Time: capture (TC), start of transport (T0), and two (T2), four (T4) and six (T6) hours of transport.

| Variable<br>(unit)            | Group | Time            |                 |                 |                 |                 |
|-------------------------------|-------|-----------------|-----------------|-----------------|-----------------|-----------------|
|                               |       | TC              | T0              | T2              | T4              | T6              |
| Na <sup>+</sup><br>(mmol/L)   | A     | 135 $\pm$ 4     | 134 $\pm$ 4     | 134 $\pm$ 4     | 134 $\pm$ 4     | 135 $\pm$ 3     |
|                               | M     | 133 $\pm$ 4     | 135 $\pm$ 3     | 134 $\pm$ 3     | 134 $\pm$ 4     | 135 $\pm$ 4     |
| K <sup>+</sup><br>(mmol/L)    | A     | 5.0 $\pm$ 0.4   | 4.1 $\pm$ 0.4   | 3.4 $\pm$ 0.3   | 3.1 $\pm$ 0.3   | 3.1 $\pm$ 0.3   |
|                               | M     | 4.7 $\pm$ 0.5   | 4.4 $\pm$ 0.4   | 3.6 $\pm$ 0.3   | 3.2 $\pm$ 0.3   | 3.0 $\pm$ 0.2   |
| Cl <sup>-</sup><br>(mmol/L)   | A     | 95 $\pm$ 5      | 92 $\pm$ 4      | 92 $\pm$ 4      | 91 $\pm$ 5      | 92 $\pm$ 5      |
|                               | M     | 95 $\pm$ 5      | 93 $\pm$ 4      | 93 $\pm$ 5      | 91 $\pm$ 5      | 91 $\pm$ 5      |
| iCa <sup>++</sup><br>(mmol/L) | A     | 1.53 $\pm$ 0.08 | 1.40 $\pm$ 0.08 | 1.41 $\pm$ 0.08 | 1.38 $\pm$ 0.06 | 1.40 $\pm$ 0.08 |
|                               | M     | 1.47 $\pm$ 0.05 | 1.38 $\pm$ 0.04 | 1.37 $\pm$ 0.05 | 1.36 $\pm$ 0.08 | 1.38 $\pm$ 0.08 |
| Mg<br>(mmol/L)                | A     | 1.26 $\pm$ 0.11 | 1.01 $\pm$ 0.09 | 0.95 $\pm$ 0.08 | 0.89 $\pm$ 0.08 | 0.84 $\pm$ 0.06 |
|                               | M     | 1.25 $\pm$ 0.12 | 1.04 $\pm$ 0.08 | 0.95 $\pm$ 0.04 | 0.88 $\pm$ 0.05 | 0.89 $\pm$ 0.13 |
| Pi<br>(mmol/L)                | A     | 1.46 $\pm$ 0.21 | 0.99 $\pm$ 0.23 | 0.97 $\pm$ 0.22 | 0.97 $\pm$ 0.24 | 0.92 $\pm$ 0.24 |
|                               | M     | 1.42 $\pm$ 0.15 | 1.05 $\pm$ 0.24 | 0.90 $\pm$ 0.29 | 0.85 $\pm$ 0.26 | 0.83 $\pm$ 0.30 |
| Albumin<br>(g/L)              | A     | 26.6 $\pm$ 1.5  | 24.6 $\pm$ 1.0  | 25.6 $\pm$ 1.5  | 25.8 $\pm$ 1.1  | 25.0 $\pm$ 0.7  |
|                               | M     | 27.4 $\pm$ 1.4  | 24.6 $\pm$ 1.8  | 26.2 $\pm$ 1.3  | 26.3 $\pm$ 1.5  | 26.1 $\pm$ 1.1  |
| Globulin<br>(g/L)             | A     | 63.4 $\pm$ 7.0  | 57.9 $\pm$ 8.8  | 59.5 $\pm$ 8.6  | 57.9 $\pm$ 8.3  | 57.6 $\pm$ 9.2  |
|                               | M     | 60.0 $\pm$ 4.1  | 53.4 $\pm$ 3.8  | 5.2 $\pm$ 3.6   | 54.2 $\pm$ 2.7  | 55.1 $\pm$ 3.7  |
| Glucose<br>(mmol/L)           | A     | 8.5 $\pm$ 2.7   | 6.3 $\pm$ 2.3   | 6.5 $\pm$ 1.9   | 7.1 $\pm$ 1.3   | 7.6 $\pm$ 1.1   |
|                               | M     | 10.1 $\pm$ 2.8  | 7.5 $\pm$ 2.4   | 7.2 $\pm$ 1.6   | 8.1 $\pm$ 1.8   | 8.0 $\pm$ 1.7   |
| Urea<br>(mmol/L)              | A     | 3.31 $\pm$ 0.37 | 3.44 $\pm$ 0.40 | -               | -               | 3.70 $\pm$ 0.41 |
|                               | M     | 3.28 $\pm$ 0.51 | 3.40 $\pm$ 0.47 | -               | -               | 3.82 $\pm$ 0.42 |
| Creatinine<br>( $\mu$ mol/L)  | A     | 145 $\pm$ 22    | 143 $\pm$ 24    | -               | -               | 139 $\pm$ 26    |
|                               | M     | 149 $\pm$ 30    | 150 $\pm$ 29    | -               | -               | 148 $\pm$ 29    |
